# Supplementary material for: Zebrafish Posterior Lateral Line primordium migration requires interactions between a superficial sheath of motile cells and the skin
Source: eLife journal article supplement (doi:10.7554/elife.58251), 2020-11-25
Supplement: data1 [file elife-58251-data1-v1.zip]

## The SAS System

### The CONTENTS Procedure

|                            |                           |                             |     |
|----------------------------|---------------------------|-----------------------------|-----|
| <b>Data Set Name</b>       | DDN.DDN                   | <b>Observations</b>         | 231 |
| <b>Member Type</b>         | DATA                      | <b>Variables</b>            | 5   |
| <b>Engine</b>              | V9                        | <b>Indexes</b>              | 0   |
| <b>Created</b>             | 09/26/2020 11:51:59       | <b>Observation Length</b>   | 40  |
| <b>Last Modified</b>       | 09/26/2020 11:51:59       | <b>Deleted Observations</b> | 0   |
| <b>Protection</b>          |                           | <b>Compressed</b>           | NO  |
| <b>Data Set Type</b>       |                           | <b>Sorted</b>               | NO  |
| <b>Label</b>               |                           |                             |     |
| <b>Data Representation</b> | WINDOWS_64                |                             |     |
| <b>Encoding</b>            | wlatin1 Western (Windows) |                             |     |

| Engine/Host Dependent Information |                     |
|-----------------------------------|---------------------|
| <b>Data Set Page Size</b>         | 65536               |
| <b>Number of Data Set Pages</b>   | 1                   |
| <b>First Data Page</b>            | 1                   |
| <b>Max Obs per Page</b>           | 1632                |
| <b>Obs in First Data Page</b>     | 231                 |
| <b>Number of Data Set Repairs</b> | 0                   |
| <b>ExtendObsCounter</b>           | YES                 |
| <b>Filename</b>                   | C:\ddn\ddn.sas7bdat |
| <b>Release Created</b>            | 9.0401M3            |
| <b>Host Created</b>               | X64_8PRO            |

| Alphabetic List of Variables and Attributes |           |      |     |        |          |           |
|---------------------------------------------|-----------|------|-----|--------|----------|-----------|
| #                                           | Variable  | Type | Len | Format | Informat | Label     |
| 4                                           | embryo    | Num  | 8   | BEST.  |          | embryo    |
| 2                                           | medium    | Num  | 8   | BEST.  |          | medium    |
| 5                                           | sample_ID | Num  | 8   | BEST.  |          | sample ID |
| 1                                           | skin      | Char | 6   | \$6.   | \$6.     | skin      |
| 3                                           | speed     | Num  | 8   | BEST.  |          | speed     |

## The SAS System

### The Mixed Procedure

| Model Information         |                     |
|---------------------------|---------------------|
| Data Set                  | DDN.DDN             |
| Dependent Variable        | speed               |
| Covariance Structure      | Variance Components |
| Subject Effect            | embryo              |
| Estimation Method         | REML                |
| Residual Variance Method  | Profile             |
| Fixed Effects SE Method   | Model-Based         |
| Degrees of Freedom Method | Containment         |

| Class Level Information |        |                          |
|-------------------------|--------|--------------------------|
| Class                   | Levels | Values                   |
| embryo                  | 10     | 1 2 3 4 5 13 14 15 16 17 |
| medium                  | 2      | 1 2                      |

| Dimensions               |    |
|--------------------------|----|
| Covariance Parameters    | 2  |
| Columns in X             | 3  |
| Columns in Z per Subject | 1  |
| Subjects                 | 10 |
| Max Obs per Subject      | 11 |

| Number of Observations          |     |
|---------------------------------|-----|
| Number of Observations Read     | 101 |
| Number of Observations Used     | 101 |
| Number of Observations Not Used | 0   |

| Iteration History |             |                 |            |
|-------------------|-------------|-----------------|------------|
| Iteration         | Evaluations | -2 Res Log Like | Criterion  |
| 0                 | 1           | -15.98297660    |            |
| 1                 | 2           | -125.06929510   | 0.00000062 |
| 2                 | 1           | -125.06939086   | 0.00000000 |

|                           |
|---------------------------|
| Convergence criteria met. |
|---------------------------|

| Covariance Parameter Estimates |         |          |                |         |        |
|--------------------------------|---------|----------|----------------|---------|--------|
| Cov Parm                       | Subject | Estimate | Standard Error | Z Value | Pr > Z |
| Intercept                      | embryo  | 0.04287  | 0.02200        | 1.95    | 0.0257 |
| Residual                       |         | 0.01137  | 0.001686       | 6.75    | <.0001 |

| Fit Statistics           |        |
|--------------------------|--------|
| -2 Res Log Likelihood    | -125.1 |
| AIC (Smaller is Better)  | -121.1 |
| AICC (Smaller is Better) | -120.9 |
| BIC (Smaller is Better)  | -120.5 |

| Solution for Fixed Effects |        |          |                |    |         |         |
|----------------------------|--------|----------|----------------|----|---------|---------|
| Effect                     | medium | Estimate | Standard Error | DF | t Value | Pr >  t |
| Intercept                  |        | 0.8071   | 0.09380        | 8  | 8.60    | <.0001  |
| medium                     | 1      | 0.1124   | 0.1327         | 91 | 0.85    | 0.3991  |
| medium                     | 2      | 0        | .              | .  | .       | .       |

| Solution for Random Effects |        |          |              |    |         |         |
|-----------------------------|--------|----------|--------------|----|---------|---------|
| Effect                      | embryo | Estimate | Std Err Pred | DF | t Value | Pr >  t |
| Intercept                   | 1      | 0.2302   | 0.09727      | 91 | 2.37    | 0.0200  |
| Intercept                   | 2      | 0.2192   | 0.09727      | 91 | 2.25    | 0.0266  |
| Intercept                   | 3      | 0.06883  | 0.09727      | 91 | 0.71    | 0.4810  |
| Intercept                   | 4      | -0.2732  | 0.09727      | 91 | -2.81   | 0.0061  |
| Intercept                   | 5      | -0.2451  | 0.09727      | 91 | -2.52   | 0.0135  |
| Intercept                   | 13     | 0.1294   | 0.09725      | 91 | 1.33    | 0.1866  |
| Intercept                   | 14     | -0.03259 | 0.09725      | 91 | -0.34   | 0.7383  |
| Intercept                   | 15     | -0.2359  | 0.09725      | 91 | -2.43   | 0.0173  |
| Intercept                   | 16     | 0.1423   | 0.09725      | 91 | 1.46    | 0.1468  |
| Intercept                   | 17     | -0.00324 | 0.09694      | 91 | -0.03   | 0.9734  |

| Type 3 Tests of Fixed Effects |        |        |         |        |
|-------------------------------|--------|--------|---------|--------|
| Effect                        | Num DF | Den DF | F Value | Pr > F |
| medium                        | 1      | 91     | 0.72    | 0.3991 |



## The SAS System

### The Mixed Procedure

| Model Information         |                     |
|---------------------------|---------------------|
| Data Set                  | DDN.DDN             |
| Dependent Variable        | speed               |
| Covariance Structure      | Variance Components |
| Subject Effect            | embryo              |
| Estimation Method         | REML                |
| Residual Variance Method  | Profile             |
| Fixed Effects SE Method   | Model-Based         |
| Degrees of Freedom Method | Containment         |

| Class Level Information |        |                            |
|-------------------------|--------|----------------------------|
| Class                   | Levels | Values                     |
| embryo                  | 10     | 6 7 8 18 19 20 21 22 23 24 |
| medium                  | 2      | 1 2                        |

| Dimensions               |    |
|--------------------------|----|
| Covariance Parameters    | 2  |
| Columns in X             | 3  |
| Columns in Z per Subject | 1  |
| Subjects                 | 10 |
| Max Obs per Subject      | 10 |

| Number of Observations          |     |
|---------------------------------|-----|
| Number of Observations Read     | 100 |
| Number of Observations Used     | 100 |
| Number of Observations Not Used | 0   |

| Iteration History |             |                 |            |
|-------------------|-------------|-----------------|------------|
| Iteration         | Evaluations | -2 Res Log Like | Criterion  |
| 0                 | 1           | -82.78913139    |            |
| 1                 | 1           | -114.21283752   | 0.00000000 |

Convergence criteria met.

| Covariance Parameter Estimates |         |          |                |         |        |
|--------------------------------|---------|----------|----------------|---------|--------|
| Cov Parm                       | Subject | Estimate | Standard Error | Z Value | Pr > Z |
| Intercept                      | embryo  | 0.01120  | 0.006312       | 1.78    | 0.0379 |
| Residual                       |         | 0.01412  | 0.002105       | 6.71    | <.0001 |

| Fit Statistics           |        |
|--------------------------|--------|
| -2 Res Log Likelihood    | -114.2 |
| AIC (Smaller is Better)  | -110.2 |
| AICC (Smaller is Better) | -110.1 |
| BIC (Smaller is Better)  | -109.6 |

| Solution for Fixed Effects |        |          |                |    |         |         |
|----------------------------|--------|----------|----------------|----|---------|---------|
| Effect                     | medium | Estimate | Standard Error | DF | t Value | Pr >  t |
| Intercept                  |        | 0.1998   | 0.04245        | 8  | 4.71    | 0.0015  |
| medium                     | 1      | -0.1430  | 0.07751        | 90 | -1.84   | 0.0683  |
| medium                     | 2      | 0        | .              | .  | .       | .       |

| Solution for Random Effects |        |          |              |    |         |         |
|-----------------------------|--------|----------|--------------|----|---------|---------|
| Effect                      | embryo | Estimate | Std Err Pred | DF | t Value | Pr >  t |
| Intercept                   | 6      | 0.02066  | 0.06761      | 90 | 0.31    | 0.7607  |
| Intercept                   | 7      | -0.08304 | 0.06761      | 90 | -1.23   | 0.2225  |
| Intercept                   | 8      | 0.06239  | 0.06761      | 90 | 0.92    | 0.3586  |
| Intercept                   | 18     | 0.05540  | 0.05173      | 90 | 1.07    | 0.2870  |
| Intercept                   | 19     | 0.07362  | 0.05173      | 90 | 1.42    | 0.1581  |
| Intercept                   | 20     | 0.05637  | 0.05173      | 90 | 1.09    | 0.2787  |
| Intercept                   | 21     | -0.08331 | 0.05173      | 90 | -1.61   | 0.1108  |
| Intercept                   | 22     | -0.2000  | 0.05173      | 90 | -3.87   | 0.0002  |
| Intercept                   | 23     | -0.00097 | 0.05173      | 90 | -0.02   | 0.9851  |
| Intercept                   | 24     | 0.09889  | 0.05173      | 90 | 1.91    | 0.0591  |

| Type 3 Tests of Fixed Effects |        |        |         |        |
|-------------------------------|--------|--------|---------|--------|
| Effect                        | Num DF | Den DF | F Value | Pr > F |
| medium                        | 1      | 90     | 3.40    | 0.0683 |

## The SAS System

### The Mixed Procedure

| Model Information         |                     |
|---------------------------|---------------------|
| Data Set                  | DDN.DDN             |
| Dependent Variable        | speed               |
| Covariance Structure      | Variance Components |
| Subject Effect            | embryo              |
| Estimation Method         | REML                |
| Residual Variance Method  | Profile             |
| Fixed Effects SE Method   | Model-Based         |
| Degrees of Freedom Method | Containment         |

| Class Level Information |        |                         |
|-------------------------|--------|-------------------------|
| Class                   | Levels | Values                  |
| embryo                  | 11     | 1 2 3 4 5 6 7 8 9 11 12 |
| skin                    | 3      | healed intact remove    |

| Dimensions               |    |
|--------------------------|----|
| Covariance Parameters    | 2  |
| Columns in X             | 4  |
| Columns in Z per Subject | 1  |
| Subjects                 | 11 |
| Max Obs per Subject      | 10 |

| Number of Observations          |     |
|---------------------------------|-----|
| Number of Observations Read     | 110 |
| Number of Observations Used     | 110 |
| Number of Observations Not Used | 0   |

| Iteration History |             |                 |            |
|-------------------|-------------|-----------------|------------|
| Iteration         | Evaluations | -2 Res Log Like | Criterion  |
| 0                 | 1           | -28.04968889    |            |
| 1                 | 1           | -110.54986815   | 0.00000000 |

Convergence criteria met.

| Covariance Parameter Estimates |         |          |                |         |        |
|--------------------------------|---------|----------|----------------|---------|--------|
| Cov Parm                       | Subject | Estimate | Standard Error | Z Value | Pr > Z |
| Intercept                      | embryo  | 0.03465  | 0.01807        | 1.92    | 0.0276 |
| Residual                       |         | 0.01485  | 0.002111       | 7.04    | <.0001 |

| Fit Statistics           |        |
|--------------------------|--------|
| -2 Res Log Likelihood    | -110.5 |
| AIC (Smaller is Better)  | -106.5 |
| AICC (Smaller is Better) | -106.4 |
| BIC (Smaller is Better)  | -105.8 |

| Solution for Fixed Effects |        |          |                |    |         |         |
|----------------------------|--------|----------|----------------|----|---------|---------|
| Effect                     | skin   | Estimate | Standard Error | DF | t Value | Pr >  t |
| Intercept                  |        | 0.05681  | 0.1098         | 8  | 0.52    | 0.6187  |
| skin                       | healed | 0.7649   | 0.1552         | 99 | 4.93    | <.0001  |
| skin                       | intact | 0.8627   | 0.1388         | 99 | 6.21    | <.0001  |
| skin                       | remove | 0        | .              | .  | .       | .       |

| Solution for Random Effects |        |          |              |    |         |         |
|-----------------------------|--------|----------|--------------|----|---------|---------|
| Effect                      | embryo | Estimate | Std Err Pred | DF | t Value | Pr >  t |
| Intercept                   | 1      | 0.2266   | 0.08983      | 99 | 2.52    | 0.0132  |
| Intercept                   | 2      | 0.2158   | 0.08983      | 99 | 2.40    | 0.0182  |
| Intercept                   | 3      | 0.06775  | 0.08983      | 99 | 0.75    | 0.4525  |
| Intercept                   | 4      | -0.2689  | 0.08983      | 99 | -2.99   | 0.0035  |
| Intercept                   | 5      | -0.2412  | 0.08983      | 99 | -2.69   | 0.0085  |
| Intercept                   | 6      | 0.02230  | 0.1118       | 99 | 0.20    | 0.8423  |
| Intercept                   | 7      | -0.08967 | 0.1118       | 99 | -0.80   | 0.4245  |
| Intercept                   | 8      | 0.06736  | 0.1118       | 99 | 0.60    | 0.5482  |
| Intercept                   | 9      | -0.1142  | 0.1118       | 99 | -1.02   | 0.3097  |
| Intercept                   | 11     | 0.06631  | 0.1118       | 99 | 0.59    | 0.5544  |
| Intercept                   | 12     | 0.04785  | 0.1118       | 99 | 0.43    | 0.6696  |

| Type 3 Tests of Fixed Effects |        |        |         |        |
|-------------------------------|--------|--------|---------|--------|
| Effect                        | Num DF | Den DF | F Value | Pr > F |
| skin                          | 2      | 99     | 20.85   | <.0001 |





## The SAS System

### The Mixed Procedure

| Model Information         |                     |
|---------------------------|---------------------|
| Data Set                  | DDN.DDN             |
| Dependent Variable        | speed               |
| Covariance Structure      | Variance Components |
| Subject Effect            | embryo              |
| Estimation Method         | REML                |
| Residual Variance Method  | Profile             |
| Fixed Effects SE Method   | Model-Based         |
| Degrees of Freedom Method | Containment         |

| Class Level Information |        |                                  |
|-------------------------|--------|----------------------------------|
| Class                   | Levels | Values                           |
| embryo                  | 13     | 1 2 3 4 5 9 11 12 13 14 15 16 17 |
| skin                    | 2      | healed intact                    |

| Dimensions               |    |
|--------------------------|----|
| Covariance Parameters    | 2  |
| Columns in X             | 3  |
| Columns in Z per Subject | 1  |
| Subjects                 | 13 |
| Max Obs per Subject      | 11 |

| Number of Observations          |     |
|---------------------------------|-----|
| Number of Observations Read     | 131 |
| Number of Observations Used     | 131 |
| Number of Observations Not Used | 0   |

| Iteration History |             |                 |            |
|-------------------|-------------|-----------------|------------|
| Iteration         | Evaluations | -2 Res Log Like | Criterion  |
| 0                 | 1           | -37.89334091    |            |
| 1                 | 2           | -174.76819460   | 0.00000019 |
| 2                 | 1           | -174.76823358   | 0.00000000 |

|                           |
|---------------------------|
| Convergence criteria met. |
|---------------------------|

| Covariance Parameter Estimates |         |          |                |         |        |
|--------------------------------|---------|----------|----------------|---------|--------|
| Cov Parm                       | Subject | Estimate | Standard Error | Z Value | Pr > Z |
| Intercept                      | embryo  | 0.03578  | 0.01570        | 2.28    | 0.0113 |
| Residual                       |         | 0.01047  | 0.001363       | 7.68    | <.0001 |

| Fit Statistics           |        |
|--------------------------|--------|
| -2 Res Log Likelihood    | -174.8 |
| AIC (Smaller is Better)  | -170.8 |
| AICC (Smaller is Better) | -170.7 |
| BIC (Smaller is Better)  | -169.6 |

| Solution for Fixed Effects |        |          |                |     |         |         |
|----------------------------|--------|----------|----------------|-----|---------|---------|
| Effect                     | skin   | Estimate | Standard Error | DF  | t Value | Pr >  t |
| Intercept                  |        | 0.8633   | 0.06068        | 11  | 14.23   | <.0001  |
| skin                       | healed | -0.04159 | 0.1263         | 118 | -0.33   | 0.7426  |
| skin                       | intact | 0        | .              | .   | .       | .       |

| Solution for Random Effects |        |          |              |     |         |         |
|-----------------------------|--------|----------|--------------|-----|---------|---------|
| Effect                      | embryo | Estimate | Std Err Pred | DF  | t Value | Pr >  t |
| Intercept                   | 1      | 0.2842   | 0.06703      | 118 | 4.24    | <.0001  |
| Intercept                   | 2      | 0.2732   | 0.06703      | 118 | 4.08    | <.0001  |
| Intercept                   | 3      | 0.1233   | 0.06703      | 118 | 1.84    | 0.0684  |
| Intercept                   | 4      | -0.2178  | 0.06703      | 118 | -3.25   | 0.0015  |
| Intercept                   | 5      | -0.1898  | 0.06703      | 118 | -2.83   | 0.0054  |
| Intercept                   | 9      | -0.1157  | 0.1123       | 118 | -1.03   | 0.3050  |
| Intercept                   | 11     | 0.06719  | 0.1123       | 118 | 0.60    | 0.5507  |
| Intercept                   | 12     | 0.04848  | 0.1123       | 118 | 0.43    | 0.6667  |
| Intercept                   | 13     | 0.07447  | 0.06703      | 118 | 1.11    | 0.2688  |
| Intercept                   | 14     | -0.08709 | 0.06703      | 118 | -1.30   | 0.1964  |
| Intercept                   | 15     | -0.2899  | 0.06703      | 118 | -4.32   | <.0001  |
| Intercept                   | 16     | 0.08735  | 0.06703      | 118 | 1.30    | 0.1951  |
| Intercept                   | 17     | -0.05796 | 0.06649      | 118 | -0.87   | 0.3851  |

| Type 3 Tests of Fixed Effects |        |        |         |        |
|-------------------------------|--------|--------|---------|--------|
| Effect                        | Num DF | Den DF | F Value | Pr > F |
| skin                          | 1      | 118    | 0.11    | 0.7426 |
